# Supplementary material for: Immunogenic Death of Hepatocellular Carcinoma Cells in Mice Expressing Caspase-Resistant ROCK1 Is Not Replicated by ROCK Inhibitors
Source: Cancers (Basel). 2022 Nov 30;14(23):5943. doi: 10.3390/cancers14235943 (PMC9740421; doi:10.3390/cancers14235943)
Supplement: Supplementary file 1 [file cancers-14-05943-s001.zip]

Archive with 4 entries (4 files):
- cancers-2027533-supplementary v5/cancers-2027533-supplementary.docx
- cancers-2027533-supplementary v5/Video S1.mp4
- cancers-2027533-supplementary v5/Video S2.mp4
- cancers-2027533-supplementary.pdf
